# Supplementary material for: Surface EMG signals in very late-stage of Duchenne muscular dystrophy: a case study
Source: J Neuroeng Rehabil. 2017 Aug 29;14:86. doi: 10.1186/s12984-017-0292-4 (PMC5576133; doi:10.1186/s12984-017-0292-4)
Supplement: Supplementary file 5 — Additional results of the simulation of the sEMG-controlled elbow orthosis. PDF file showing two figures with additional results of the simulation of the sEMG-controlled elbow orthosis. (PDF 899 kb) [file 12984_2017_292_MOESM5_ESM.pdf]

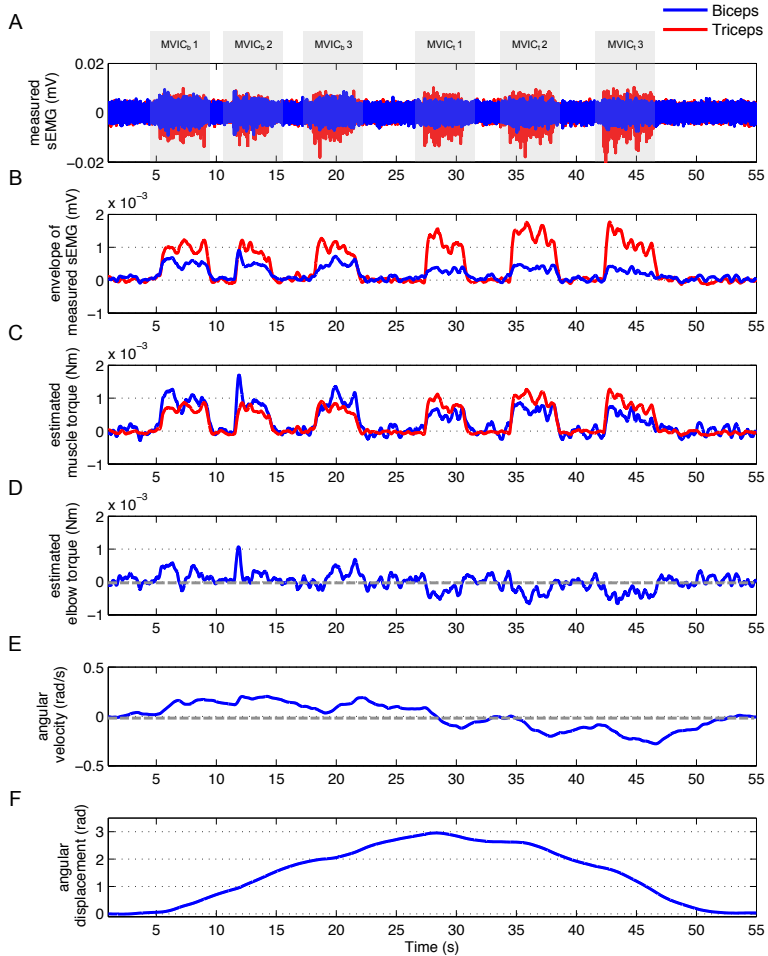

**Figure 6** Additional results of the simulation of the sEMG-controlled elbow orthosis. **A)** Raw sEMG signals used as input for the simulation. Specifically the three MVICs of the biceps (blue;  $MVIC_{b1}$ ,  $MVIC_{b2}$ ,  $MVIC_{b3}$ ) and the three MVICs of the triceps (red;  $MVIC_{t1}$ ,  $MVIC_{t2}$ ,  $MVIC_{t3}$ ). **B)** Envelopes of the raw sEMG signals of the biceps (blue) and triceps (red). **C)** Estimated muscle torque of the biceps (blue) and triceps (red) obtained by multiplying the envelopes multiplying by the mapping gains  $K_b$  and  $K_t$ . **D)** Estimated elbow torque calculated by subtracting the estimated triceps torque from the estimated biceps torque (Eq 4). **E)** Angular velocity resulting from the admittance model (Eq 5). **F)** Elbow angle displacement resulting from the integral of the angular velocity (Eq 5).

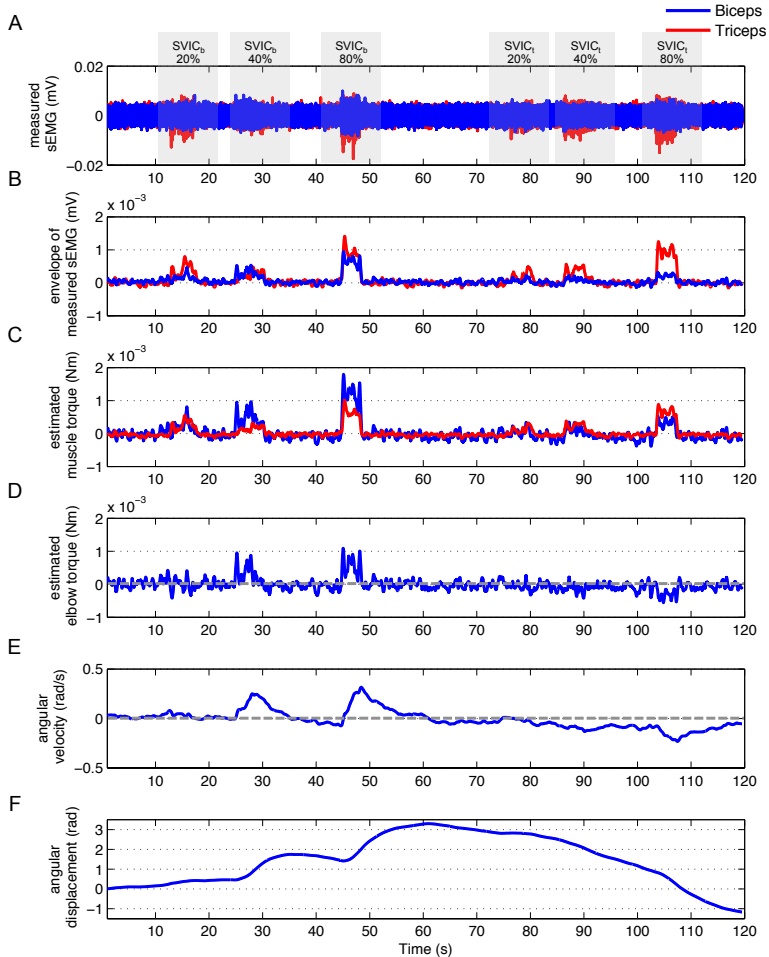

**Figure 7** Additional results of the simulation of the sEMG-controlled elbow orthosis. **A)** Raw sEMG signals used as input for the simulation. Specifically the three SVIC of the biceps (blue;  $SVIC_b$  20%,  $SVIC_b$  40%,  $SVIC_b$  80%) and the three SVICs of the triceps (red;  $SVIC_t$  20%,  $SVIC_t$  40%,  $SVIC_t$  80%). **B)** Envelopes of the raw sEMG signals of the biceps (blue) and triceps (red) obtained by multiplying the envelopes multiplying by the mapping gains  $K_b$  and  $K_t$ . **C)** Estimated muscle torque of the biceps (blue) and triceps (red) obtained by multiplying the envelopes multiplying by the mapping gains  $K_b$  and  $K_t$ . **D)** Estimated elbow torque calculated by subtracting the estimated triceps torque from the estimated biceps torque (Eq 4). **E)** Angular velocity resulting from the admittance model (Eq 5). **F)** Elbow angle displacement resulting from the integral of the angular velocity (Eq 5).
